# Supplementary material for: Core-electron contributions to the molecular magnetic response
Source: Royal Society of Chemistry journal article supplement (doi:10.1039/d1cp05713h), 2022-01-01
Supplement: d1cp05713h1.pdf [file d1cp05713h1.pdf]

# Electronic Supporting Information:

## Core-electron contributions to the molecular magnetic response

Mesías Orozco-Ic,<sup>\*,a</sup> Nickolas D. Charistos,<sup>b</sup> Alvaro Muñoz-Castro,<sup>c</sup>

Rafael Islas,<sup>d</sup> Dage Sundholm,<sup>\*,a</sup> and Gabriel Merino.<sup>\*,e</sup>

<sup>a</sup> Department of Chemistry, Faculty of Science, University of Helsinki, P.O. Box 55, A. I.  
Virtasen aukio 1, FIN-00014 Helsinki, Finland.

<sup>b</sup> Aristotle University of Thessaloniki, Department of Chemistry, Laboratory of Quantum and  
Computational Chemistry, Thessaloniki, Greece, 54 124.

<sup>c</sup> Grupo de Química Inorgánica y Materiales Moleculares, Facultad de Ingeniería,  
Universidad Autónoma de Chile, El Llano Subercaseaux 2801, Santiago, Chile.

<sup>d</sup> Departamento de Ciencias Químicas, Facultad de Ciencias Exactas, Universidad Andrés  
Bello, Av. República 275, 8370146, Santiago, Chile.

<sup>e</sup> Departamento de Física Aplicada, Centro de Investigación y de Estudios Avanzados,  
Unidad Mérida. Km 6 Antigua Carretera a Progreso. Apdo. Postal 73, Cordemex, 97310,  
Mérida, Yuc., México.

### Corresponding Authors

\*E-mail: mesias.oroico@helsinki.fi (M.O.-I.).

\*E-mail: dage.sundholm@helsinki.fi (D.S.)

\*E-mail: gmerino@cinvestav.mx (G.M.)

**Table S1.** Energy gaps in eV between the lowest occupied  $\sigma$ -orbital and the highest occupied core-electron orbital ( $\Delta_{\text{Lo-Hcore}}$ ) computed at PBE0-D3/def2-TZVP level.

| Molecule                 | $\Delta_{\text{Lo-Hcore}}$ |
|--------------------------|----------------------------|
| Benzene                  | 254.2                      |
| Corannulene ( $C_{5v}$ ) | 252.4                      |
| Corannulene ( $D_{5h}$ ) | 252.0                      |
| $C_{60}$                 | 252.0                      |
| [14]helicene             | 252.7                      |

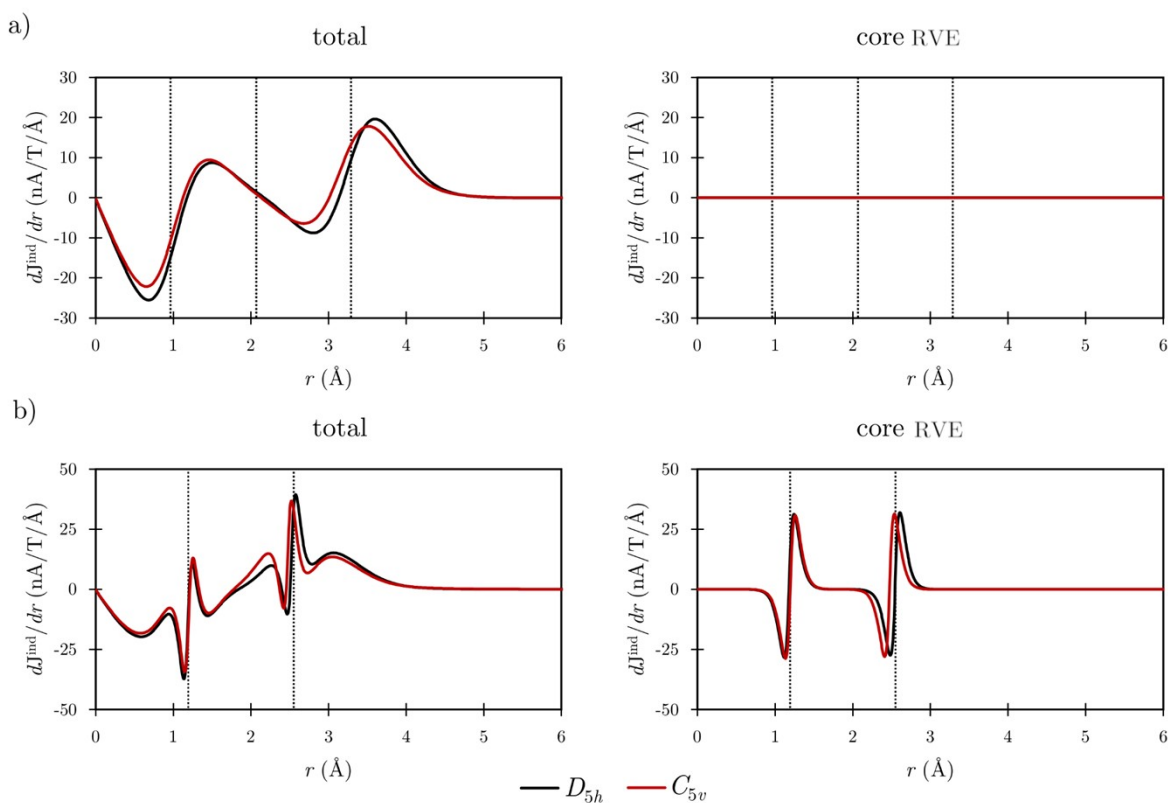

**Figure S1.**  $dJ^{\text{ind}}/dr$  plots computed along a plane crossing: a) the C-C bonds and b) the carbon nuclei for corannulene isomers. The vertical dotted lines show the  $r$  values corresponding to a) the innermost C-C bond, the center of the 6-MR and the outermost C-C bond, respectively. In b), the dotted lines correspond to the carbon nuclei.

**Table S2.** GIAO-CMO analysis of  $B_z^{\text{ind}}(0)$  and NICS(0) values (in parentheses) in ppm calculated at the PBE0/TZ2P level with ADF's NMR module at the center of benzene, the centers of 5-MR and 6-MR rings of corannulene structures ( $D_{5h}$  and  $C_{5v}$ ), the center of  $C_{60}$  cage, and the centers of each 6-MR of [14]helicene labeled from A to G from the outermost to the middle ring.

| Molecule                |      | core<br>CMO | core<br>RVE | $\sigma$<br>CMO | $\sigma$<br>RVE | core + $\sigma$ | $\pi$    | Total    |
|-------------------------|------|-------------|-------------|-----------------|-----------------|-----------------|----------|----------|
| Benzene                 |      | -12.37      | 0.03        | 34.20           | 21.81           | 21.83           | -36.84   | -15.01   |
|                         |      | (-4.28)     | (-0.44)     | (21.06)         | (17.22)         | (16.78)         | (-24.66) | (-7.88)  |
| Corannulene<br>$D_{5h}$ | 5-MR | -22.91      | 0.18        | 54.42           | 31.32           | 31.50           | 29.34    | 60.84    |
|                         |      | (-7.95)     | (-0.37)     | (28.51)         | (20.92)         | (20.55)         | (-7.61)  | (12.95)  |
|                         | 6-MR | -15.90      | 0.18        | 40.68           | 24.60           | 24.78           | -24.37   | 0.41     |
|                         |      | (-5.50)     | (-0.32)     | (21.84)         | (16.67)         | (16.34)         | (-20.94) | (-4.60)  |
| Corannulene<br>$C_{5v}$ | 5-MR | -22.16      | 0.35        | 33.21           | 10.71           | 11.05           | 41.30    | 52.36    |
|                         |      | (-8.65)     | (-0.29)     | (13.10)         | (4.74)          | (4.45)          | (4.70)   | (9.14)   |
|                         | 6-MR | -16.27      | 0.08        | 31.44           | 15.09           | 15.17           | -18.64   | -3.47    |
|                         |      | (-6.56)     | (-0.33)     | (17.64)         | (11.41)         | (11.08)         | (-17.34) | (-6.26)  |
| $C_{60}$                |      | -28.62      | -0.03       | 8.76            | -19.84          | -19.86          | 15.56    | -4.30    |
|                         |      | (-28.64)    | (-0.02)     | (8.78)          | (-19.84)        | (-19.86)        | (15.57)  | (-4.29)  |
| [14]helicene            | A    | -19.03      | -0.05       | 8.38            | -10.61          | -10.65          | -10.00   | -20.65   |
|                         |      | (-7.24)     | (-0.40)     | (6.14)          | (-0.70)         | (-1.10)         | (-9.14)  | (-10.24) |
|                         | B    | -21.95      | -0.03       | 9.52            | -12.39          | -12.42          | 1.12     | -11.30   |
|                         |      | (-8.91)     | (-0.41)     | (5.55)          | (-2.96)         | (-3.36)         | (-4.12)  | (-7.49)  |
|                         | C    | -22.63      | -0.05       | 5.70            | -10.86          | -16.93          | 5.63     | -11.30   |
|                         |      | (-9.87)     | (-0.42)     | (2.78)          | (-6.68)         | (-7.09)         | (-0.18)  | (-7.27)  |
|                         | D    | -22.06      | -0.02       | 3.77            | -18.26          | -18.28          | 9.15     | -9.13    |
|                         |      | (-10.55)    | (-0.45)     | (0.58)          | (-9.52)         | (-9.96)         | (3.61)   | (-6.35)  |
|                         | E    | -22.13      | -0.05       | 6.93            | -15.15          | -15.20          | 8.90     | -6.30    |
|                         |      | (-11.79)    | (-0.50)     | (0.70)          | (-10.60)        | (-11.09)        | (5.89)   | (-5.20)  |
|                         | F    | -23.13      | -0.12       | 4.98            | -18.03          | -18.15          | 8.87     | -9.28    |
|                         |      | (-14.08)    | (-0.56)     | (0.06)          | (-13.46)        | (-14.02)        | (7.67)   | (-6.35)  |
|                         | G    | -24.52      | -0.36       | -7.75           | -31.90          | -32.26          | 20.30    | -11.97   |
|                         |      | (-15.98)    | (-0.62)     | (-4.29)         | (-19.65)        | (-20.27)        | (13.28)  | (-6.99)  |
